# Supplementary material
Source: Royal Society of Chemistry journal article supplement (doi:10.1039/d6ta01706a)
Supplement: d6ta01706a1.pdf [file d6ta01706a1.pdf]

## Supporting Information

### **Towards economically feasible recycling of spent LiFePO<sub>4</sub> black mass: a thermodynamic-assisted targeted delithiation strategy**

*Dongxian Chen*<sup>1,2,3</sup>, *Shiyu Zhou*<sup>1,2,3</sup>, *Siyu Wu*<sup>1,2,3</sup>, *Shuai Gu*<sup>1,2,3\*</sup>, *Jianguo Yu*<sup>1,2,3\*</sup>

<sup>1</sup>National Engineering Research Center for Integrated Utilization of Salt Lake Resources, East China University of Science and Technology, Shanghai 200237, China

<sup>2</sup>Engineering Research Center of Salt Lake Resources Process Engineering, Ministry of Education, East China University of Science and Technology, Shanghai 200237, China

<sup>3</sup>Joint International Laboratory for Potassium and Lithium Strategic Resources, East China University of Science and Technology Shanghai 200237, China

Corresponding Author: [gushuai@ecust.edu.cn](mailto:gushuai@ecust.edu.cn) (Shuai Gu)

[jgyu@ecust.edu.cn](mailto:jgyu@ecust.edu.cn) (Jianguo Yu)

#### **Table of contents**

|                                                                                                                                                                                                                             |    |
|-----------------------------------------------------------------------------------------------------------------------------------------------------------------------------------------------------------------------------|----|
| <b>Table. S1</b> Elemental content of spent LFP materials.                                                                                                                                                                  | S2 |
| <b>Fig. S1</b> Schematic illustration of anode electrode assembly                                                                                                                                                           | S2 |
| <b>Table S2</b> Chemicals, formulas, and reactions used in the thermodynamic calculations                                                                                                                                   | S3 |
| <b>Fig. S2</b> Curves of anode potential at different cell voltages (a) and current density (b) with time                                                                                                                   | S4 |
| <b>Fig. S3</b> Time-dependent variations of cell voltage and current under different operational conditions: (a) effect of solution pH; (b) influence of cell voltage; (c) impact of current                                | S4 |
| <b>Fig. S4</b> Comparison of XRD images for lithium chloride product and reference card (a),<br>Species distributions of Li <sup>+</sup> with varying pH and Fe <sup>2+</sup> /Fe <sup>3+</sup> precipitation pH range (b). | S5 |
| <b>Table S3</b> Economic analysis for recycling 1 ton of scrap LiFePO <sub>4</sub> materials by the<br>proposed process in China (exchange rate: 1 \$ = 6.90 CNY)                                                           | S6 |

**Table. S1. Elemental content of spent LFP materials.**

| Elements    | Li   | Fe   | P     | Al   | Mn   | Cu   |
|-------------|------|------|-------|------|------|------|
| Content/wt% | 4.26 | 35.8 | 19.08 | 0.53 | 0.04 | 0.51 |

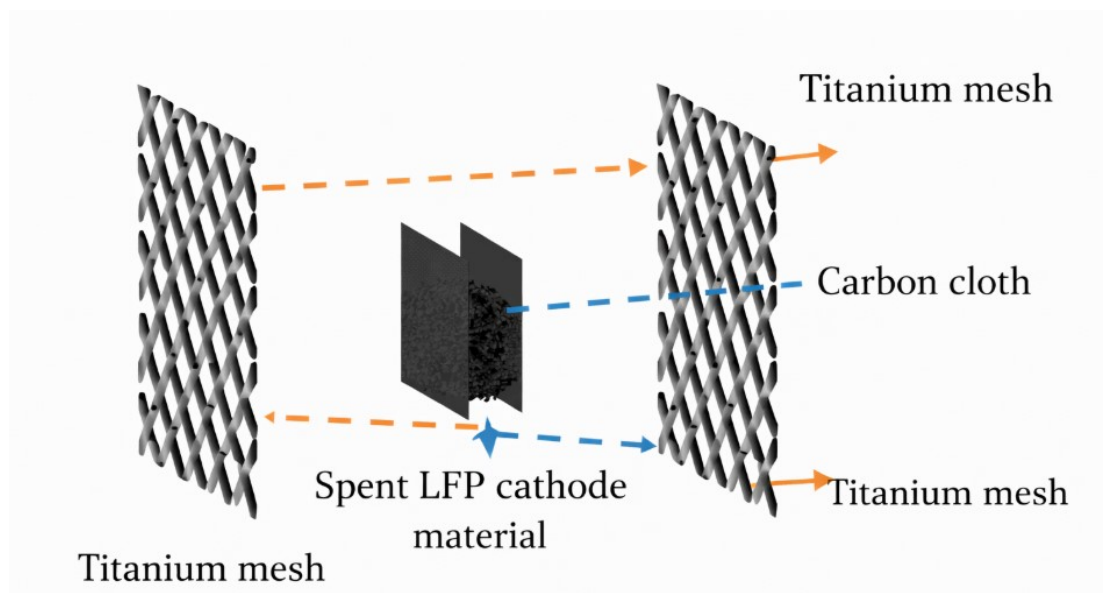

**Fig. S1 Schematic illustration of anode electrode assembly**

The thermodynamic data used in this work were obtained from published literature and the HSC Chemistry 10.0 database. Based on these data, the possible chemical reactions in the leaching system were identified, and the corresponding Gibbs free energy change ( $\Delta G$ ) and equilibrium constant ( $K$ ) were calculated. The thermodynamic parameters at different temperatures were then determined according to Eqs. (12), (13), and (14). The detailed calculation procedure is described as follows.

**Table S2** Chemicals, formulas, and reactions used in the thermodynamic calculations

| Chemical Reactions                                                     |      |
|------------------------------------------------------------------------|------|
| $Fe(OH)_3 + 3H^+ \leftrightarrow Fe^{3+} + 3H_2O$                      | (1)  |
| $Fe(OH)_2 + 2H^+ \leftrightarrow Fe^{2+} + 2H_2O$                      | (2)  |
| $Fe^{3+} + e^- = Fe^{2+}$                                              | (3)  |
| $H_2O \leftrightarrow H^+ + OH^-$                                      | (4)  |
| $Fe(OH)_3 + 3H^+ + H_2PO_4^- \leftrightarrow FeH_2PO_4^{2+} + 3H_2O$   | (5)  |
| $Fe(OH)_3 + 3H^+ + 2H_2PO_4^- \leftrightarrow Fe(H_2PO_4)_2^+ + 3H_2O$ | (6)  |
| $Fe(OH)_3 + 3H^+ + HPO_4^{2-} \leftrightarrow FeHPO_4^+ + 3H_2O$       | (7)  |
| $Fe(OH)_3 + 3H^+ + 3H_2PO_4^- \leftrightarrow Fe(H_2PO_4)_3 + 3H_2O$   | (8)  |
| $Fe(OH)_2 + 2H^+ + H_2PO_4^- \leftrightarrow FeH_2PO_4^+ + 2H_2O$      | (9)  |
| $Fe(OH)_2 + 2H^+ + 2H_2PO_4^- \leftrightarrow Fe(H_2PO_4)_2 + 2H_2O$   | (10) |
| $Fe(OH)_3 + 3H^+ + H_3PO_4 \leftrightarrow Fe(H_2PO_4)_2 + 3H_2O$      | (11) |
| $\Delta G^\theta = \Delta H^\theta - T\Delta S^\theta$                 | (12) |
| $\Delta G^\theta = -RT \ln K$                                          | (13) |
| $\Delta G = \Delta G^\theta + RT \ln Q$                                | (14) |

where  $\Delta G$  is the Gibbs free energy change,  $Q$  is the reaction quotient,  $R$  is the molar gas constant

(8.31447 J/K·mol),  $T$  is the absolute temperature (K),  $\Delta G_{\theta}$  is the standard Gibbs free energy change (kJ·mol<sup>-1</sup>),  $\Delta H_{\theta}$  is the standard enthalpy change (kJ·mol<sup>-1</sup>),  $\Delta S_{\theta}$  is the standard entropy change (J·mol<sup>-1</sup>·K<sup>-1</sup>), and  $K$  is the equilibrium constant.

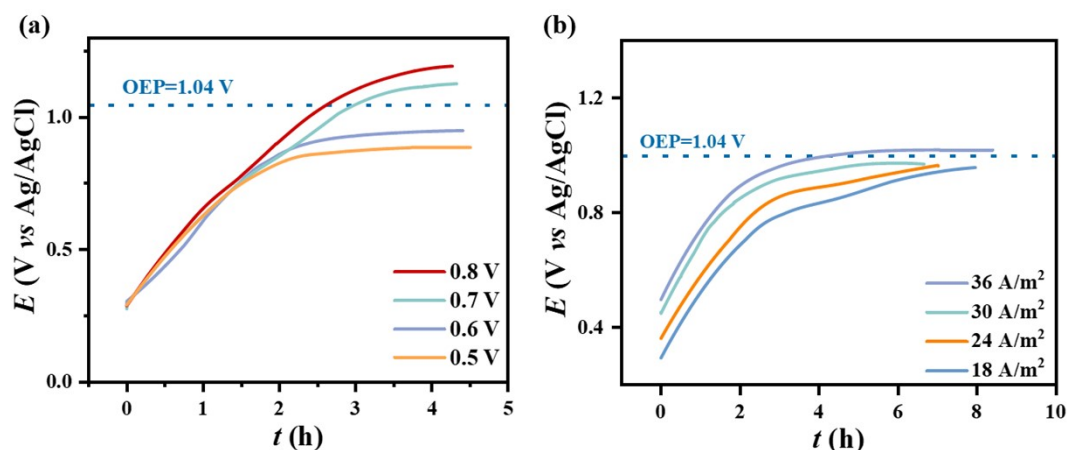

**Fig. S2** Curves of anode potential at different cell voltages (a) and current density (b) with time.

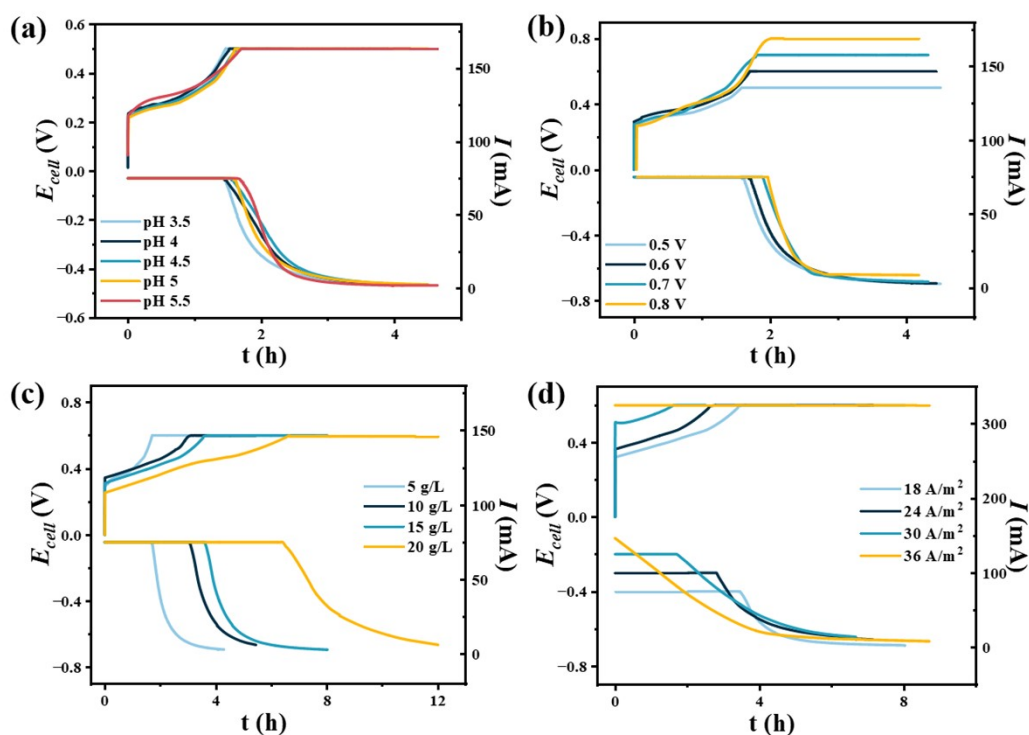

**Fig. S3** Time-dependent variations of cell voltage and current under different operational conditions: (a) effect of solution pH; (b) influence of cell voltage; (c) impact of current density; (d) effect of solid-to-liquid ratio

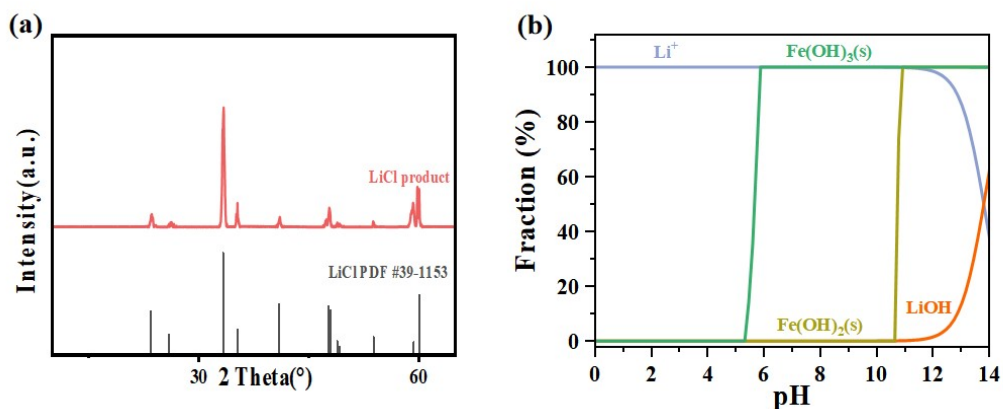

**Fig. S4 Comparison of XRD images for lithium chloride product and reference card (a), Species distributions of  $\text{Li}^+$  with varying pH and  $\text{Fe}^{2+}/\text{Fe}^{3+}$  precipitation pH range (b).**

Table S3 presents a preliminary economic comparison between the method developed in this study and the reported method in terms of product revenue, energy cost, and material consumption. It should be noted that the major reaction media and electrolytes in both electrochemical routes are potentially recyclable within the process, which is different from conventional acid-leaching systems where reagent consumption is usually explicit and continuous. Therefore, reagent cost was not separately discussed in this table. Instead, the analysis was performed based on parameters that are clearly available and reasonably comparable from the literature, including product revenue, energy cost, and electrode material consumption. Items lacking consistent reporting or those that could not be compared under similar system boundaries were not included, in order to maintain the clarity and rationality of the comparison. The prices of various products were checked from Internet. Besides, the calculation method of energy cost was referred from literatures<sup>[1]</sup>.

**Table S3 Economic analysis for recycling 1 ton of scrap LiFePO<sub>4</sub> materials by the proposed process in China (exchange rate: 1 \$ = 6.90 CNY)**

|                             | This paper                  |                        |                 | Reported paper                  |                       |                 |
|-----------------------------|-----------------------------|------------------------|-----------------|---------------------------------|-----------------------|-----------------|
| <b>Revenue</b>              | Products                    | Mass (g)               | Benefits (\$)   | Products                        | Mass (kg)             | Benefits (\$)   |
|                             | LiCl                        | 203.74                 | 2384.88         | Li <sub>2</sub> CO <sub>3</sub> | 169.81                | 2037.72         |
|                             | FePO <sub>4</sub>           | 788.98                 | 946.78          | FePO <sub>4</sub>               | 728.29                | 873.948         |
|                             |                             |                        |                 | NaOH                            | 200                   | 80              |
| <b>Energy cost</b>          | Procedure                   | Consumption (kWh)      | Cost (\$)       | Procedure                       | Consumption (kWh)     | Cost (\$)       |
|                             | electrolysis                | 285.86                 | -12.879         | Slurry electrolysis             | 1304.35               | -195.65         |
|                             | Evaporative crystallization | 1100                   | -165            | Evaporative crystallization     | 1100                  | -165            |
|                             | Filtering and drying        | 230                    | -34.5           | Filtering and drying            | 230                   | -34.5           |
| <b>Material consumption</b> | Procedure                   | Area (m <sup>2</sup> ) |                 | Procedure                       | Area(m <sup>2</sup> ) |                 |
|                             | Carbon fiber fabric         | 0.5                    | -433.56         | Ru-Ti                           | 0.25                  | -1070.26        |
| <b>Total profit</b>         |                             |                        | <b>2685.721</b> |                                 |                       | <b>1526.258</b> |

## Reference

- (1) <https://chinese.alibaba.com/product-detail/Battery-Grade-Ferric-Phosphate-Raw-Material-1601125244817.html?spm=a27aq.29918103.4207392620.1.5c8750dfB65NF8&trafficsource=detail>
  - (2) [https://www.alibaba.com/product-detail/Fast-Delivery-Best-Price-LiCl-Anhydrous\\_1600552057052.html?spm=a2700.galleryofferlist.normal\\_offer.d\\_image.413613a0ZmBedV&priceId=b496b9e0c6a944bc85a5fd792f1375ba](https://www.alibaba.com/product-detail/Fast-Delivery-Best-Price-LiCl-Anhydrous_1600552057052.html?spm=a2700.galleryofferlist.normal_offer.d_image.413613a0ZmBedV&priceId=b496b9e0c6a944bc85a5fd792f1375ba)
  - (3) [https://www.alibaba.com/product-detail/KIG-Hot-Sales-Ruthenium-Plating-Titanium\\_1601224333587.html?spm=a2700.galleryofferlist.normal\\_offer.d\\_image.6e6b13a0rsgD9&priceId=b4e3bbe74834432382cf90fc4a432ac5](https://www.alibaba.com/product-detail/KIG-Hot-Sales-Ruthenium-Plating-Titanium_1601224333587.html?spm=a2700.galleryofferlist.normal_offer.d_image.6e6b13a0rsgD9&priceId=b4e3bbe74834432382cf90fc4a432ac5)
  - (4) [https://www.alibaba.com/product-detail/KIG-Hot-Sales-Ruthenium-Plating-Titanium\\_1601224333587.html?spm=a2700.galleryofferlist.normal\\_offer.d\\_image.6e6b13a0rsgD9&priceId=b4e3bbe74834432382cf90fc4a432ac5](https://www.alibaba.com/product-detail/KIG-Hot-Sales-Ruthenium-Plating-Titanium_1601224333587.html?spm=a2700.galleryofferlist.normal_offer.d_image.6e6b13a0rsgD9&priceId=b4e3bbe74834432382cf90fc4a432ac5)
- [1] Z. Li, D.F. Liu, J. Xiong, L. He, Z. Zhao, D. Wang, Selective recovery of lithium and iron phosphate/carbon from spent lithium iron phosphate cathode material by anionic membrane slurry electrolysis, *Waste Management* 107 (2020) 1–8. <https://doi.org/10.1016/J.WASMAN.2020.03.017>.
